# Supplementary material for: Two- and three-photon excitable quaternized imidazo[1,2-a]pyridines as mitochondrial imaging and potent cancer therapy agents
Source: Royal Society of Chemistry journal article supplement (doi:10.1039/d0ob01585g), 2020-01-01

**Two- and three-photon excitable quaternized imidazo[1,2-a]pyridines  
for mitochondrial imaging and potent cancer therapy agent**

Eiji Hase,<sup>a,b</sup> Hiroki Takanari,<sup>b,c</sup> Keita Hoshi,<sup>d</sup> Masaki Okamoto,<sup>d</sup> Atsushi Tabata,<sup>e</sup> Hideaki Nagamune,<sup>e</sup>  
Takeo Minamikawa,<sup>a,b</sup> Takeshi Yasui,<sup>a,b</sup> Yasushi Yoshida,<sup>f</sup> Keiji Minagawa,<sup>d</sup> Yasuhiko Kawamura,<sup>d</sup>  
Yasushi Imada<sup>d</sup> and Fumitoshi Yagishita<sup>\*a,b,d</sup>

<sup>a</sup>*Department of Post-LED Photonics Research, Institute of Post-LED Photonics, Tokushima University,  
2-1Minamijosanjima, Tokushima 770-8506, Japan*

<sup>b</sup>*Research Cluster on “Multi-scale Vibrational Microscopy for Comprehensive Diagnosis and Treatment of  
Cancer”, Tokushima University, Tokushima, 770-8506, Japan*

<sup>c</sup>*Department of Interdisciplinary Researches for Medicine and Photonics, Institute of Post-LED Photonics,  
Tokushima University, Tokushima, 770-8503, Japan*

<sup>d</sup>*Department of Applied Chemistry, Tokushima University, 2-1 Minamijosanjima, Tokushima, 770-8506, Japan*

<sup>e</sup>*Department of Bioscience and Biotechnology, Tokushima University, Tokushima, 770-8513, Japan*

<sup>f</sup>*Department of Applied Chemistry and Biotechnology, Graduate School of Engineering,  
Chiba University, Yayoi-cho, Inage-ku, Chiba 263-8522, Japan*

\*Corresponding author. Tel.: +81-88-656-7405; E-mail: yagishitaf@tokushima-u.ac.jp

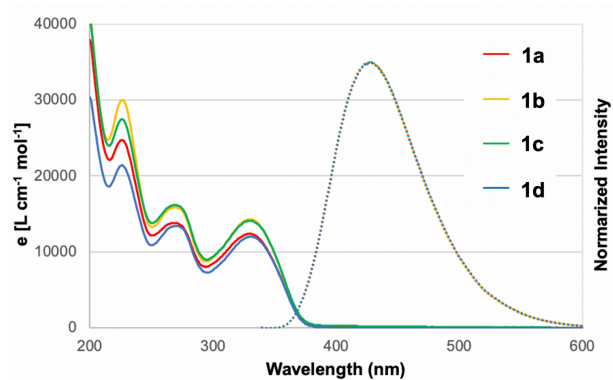

**Fig. S1** Absorption (solid line) and fluorescence (dashed line) spectra of **1** in water.

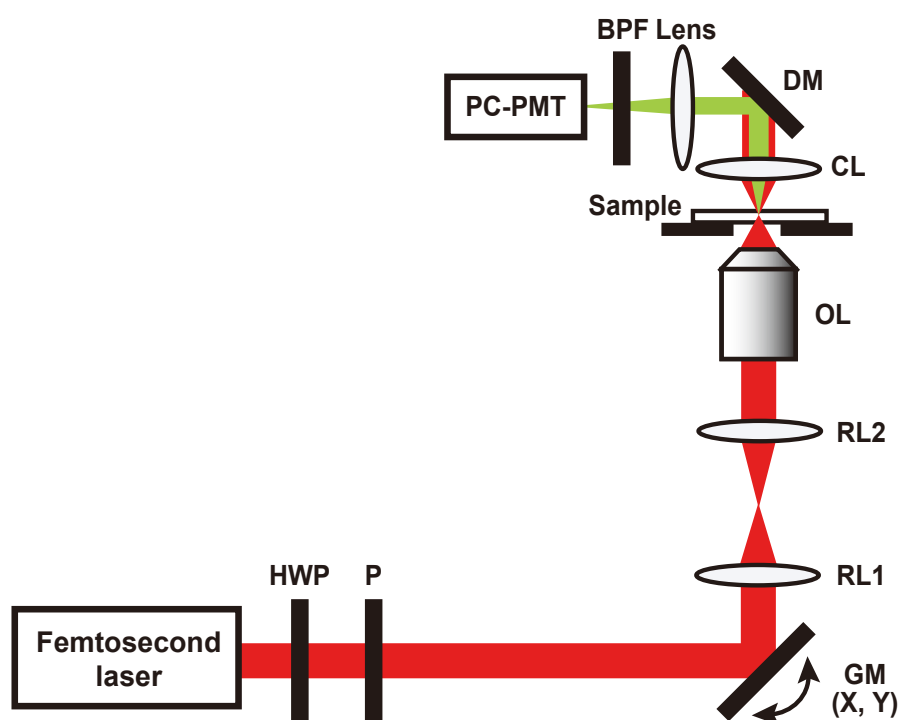

**Fig. S2** Experimental setup for multi-photon microscopy. HWP: half-wave plate; P: polarizer; GM: galvanometer mirror; RL1 and RL2: relay lenses; OL: objective lens; CL: condenser lens; DM: dichroic mirror; BPF: optical band-pass filter; PC-PMT: photon-counting photomultiplier.

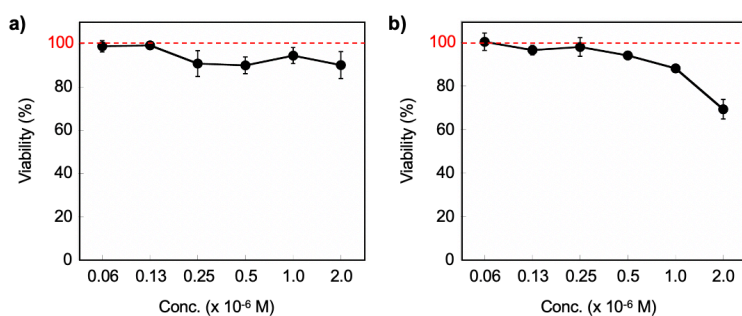

**Fig. S3** The viabilities of HeLa cells incubated with various concentrations of **1a** after a) 1 hour and b) 24 hours.

a) In the presence of **1a**

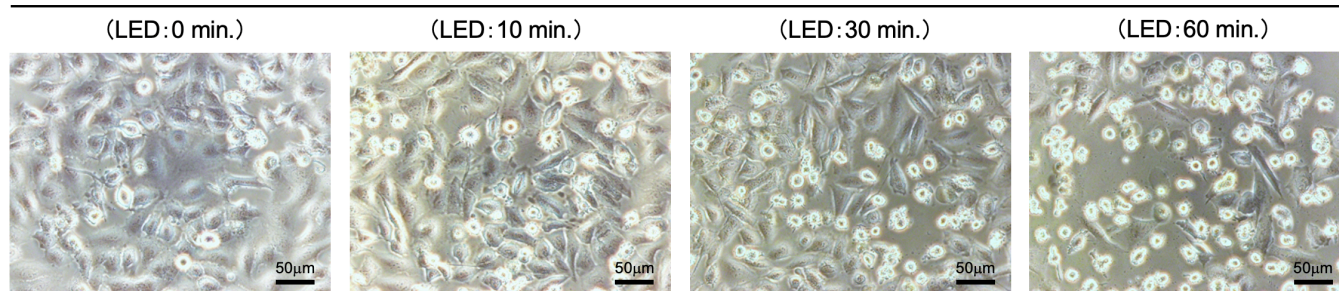

b) In the absence of **1a**

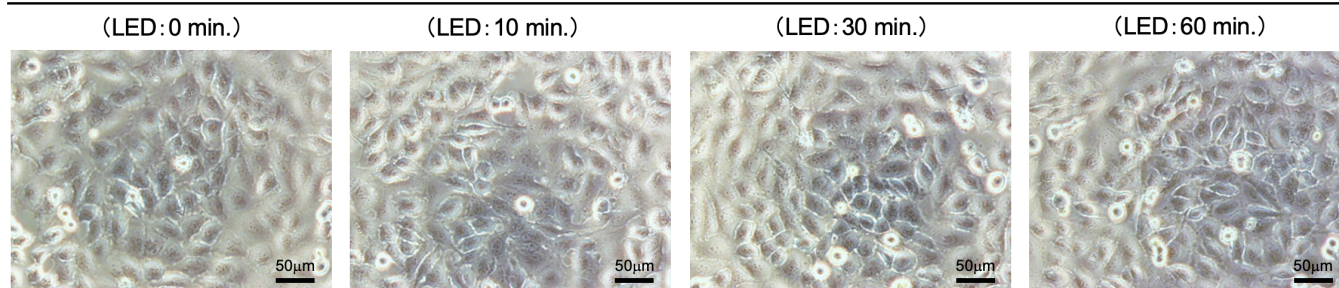

**Fig. S4** The photographs of HeLa cells incubated a) in the presence of **1a** and b) in the absence of **1a**.

# Compound 3

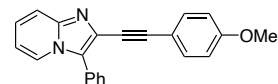

## <sup>1</sup>H NMR

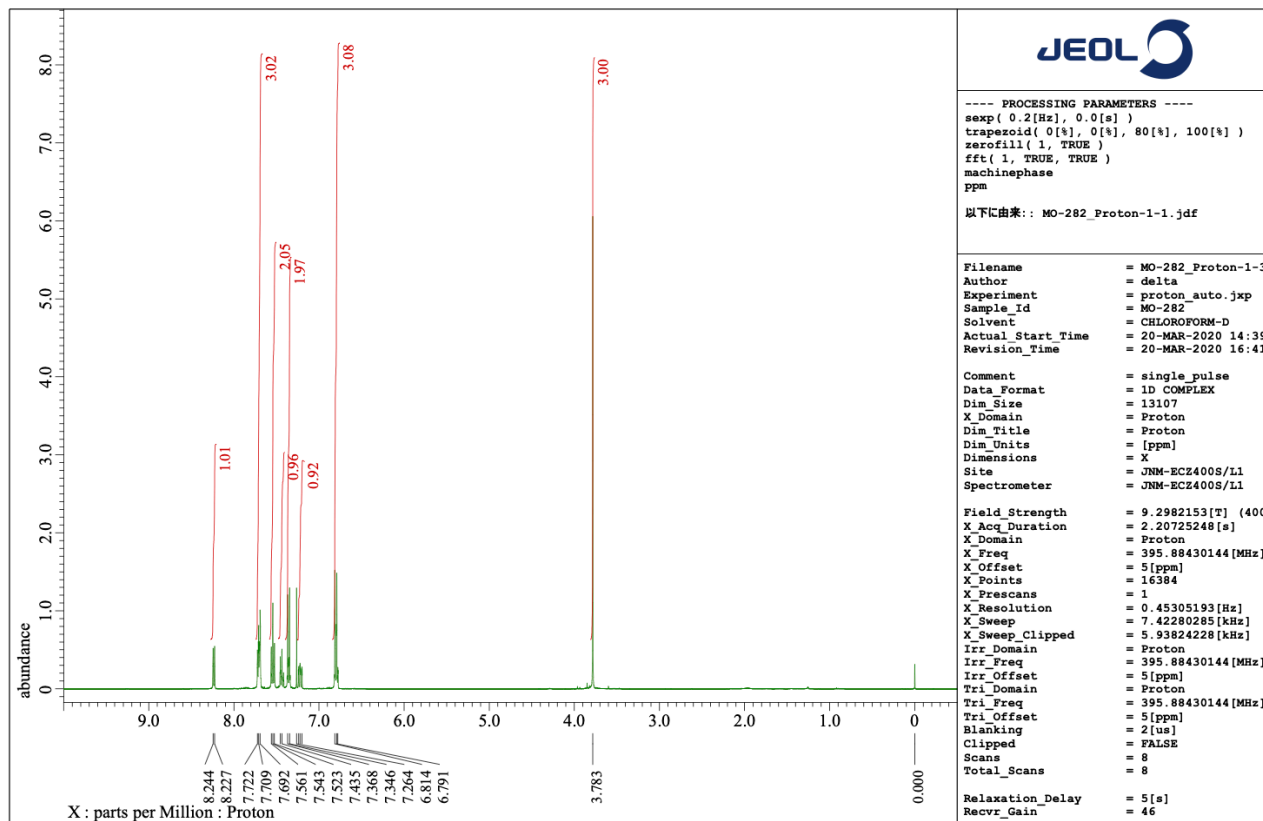

## <sup>13</sup>C NMR

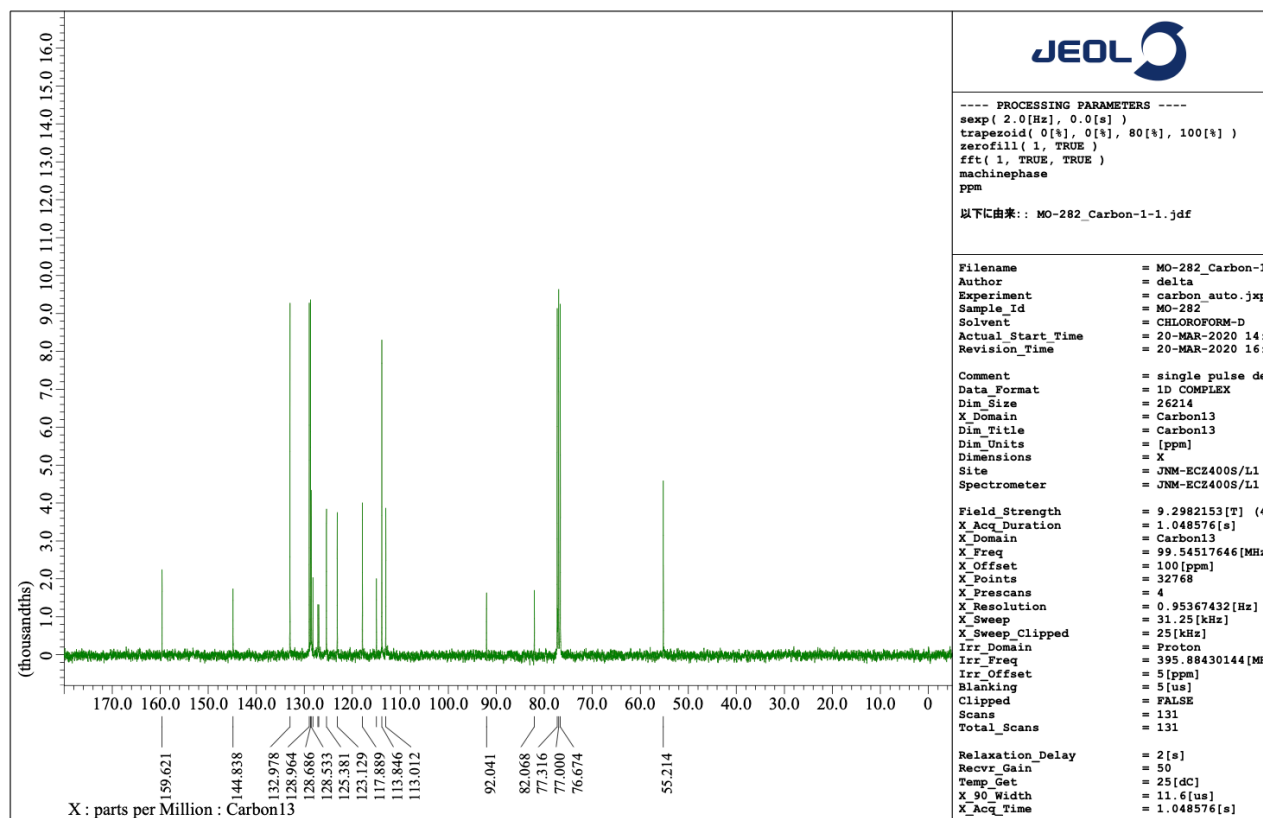

# Compound 1a

## <sup>1</sup>H NMR

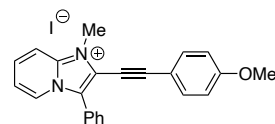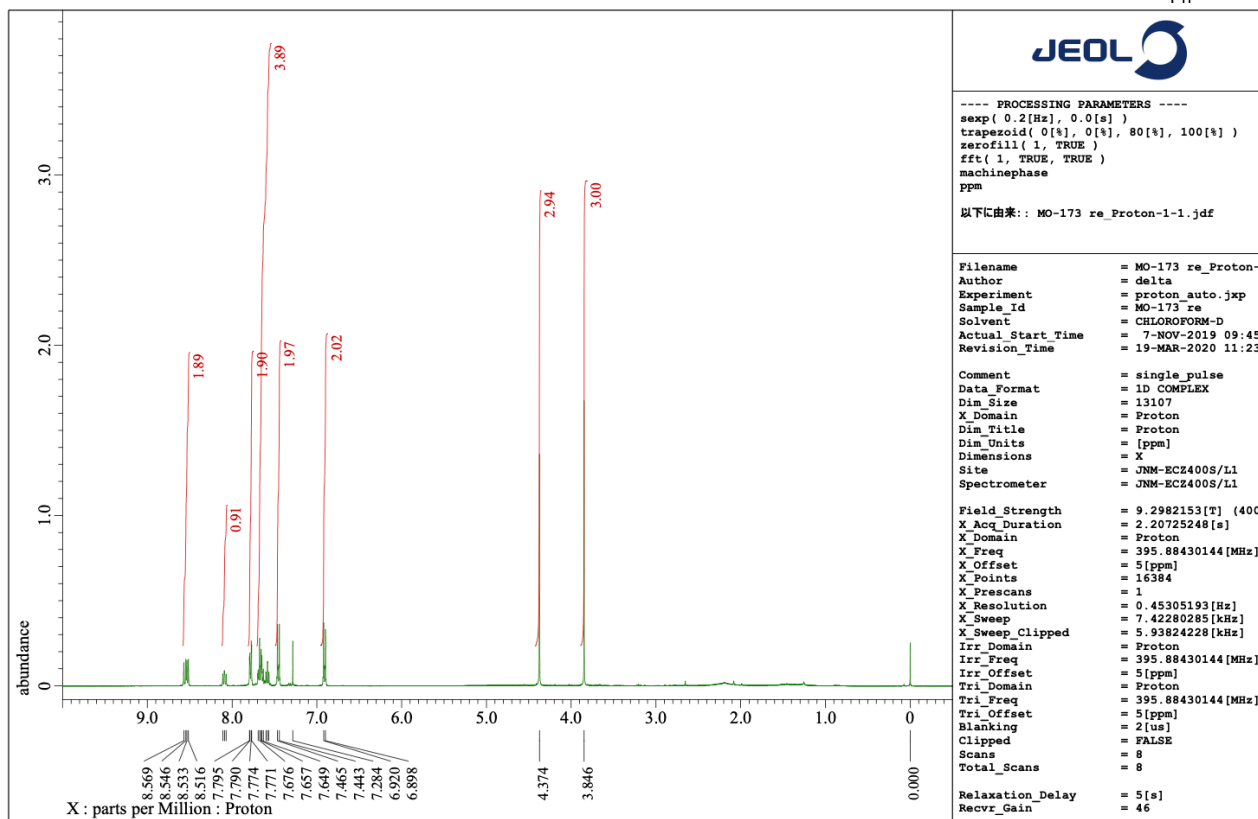

## <sup>13</sup>C NMR

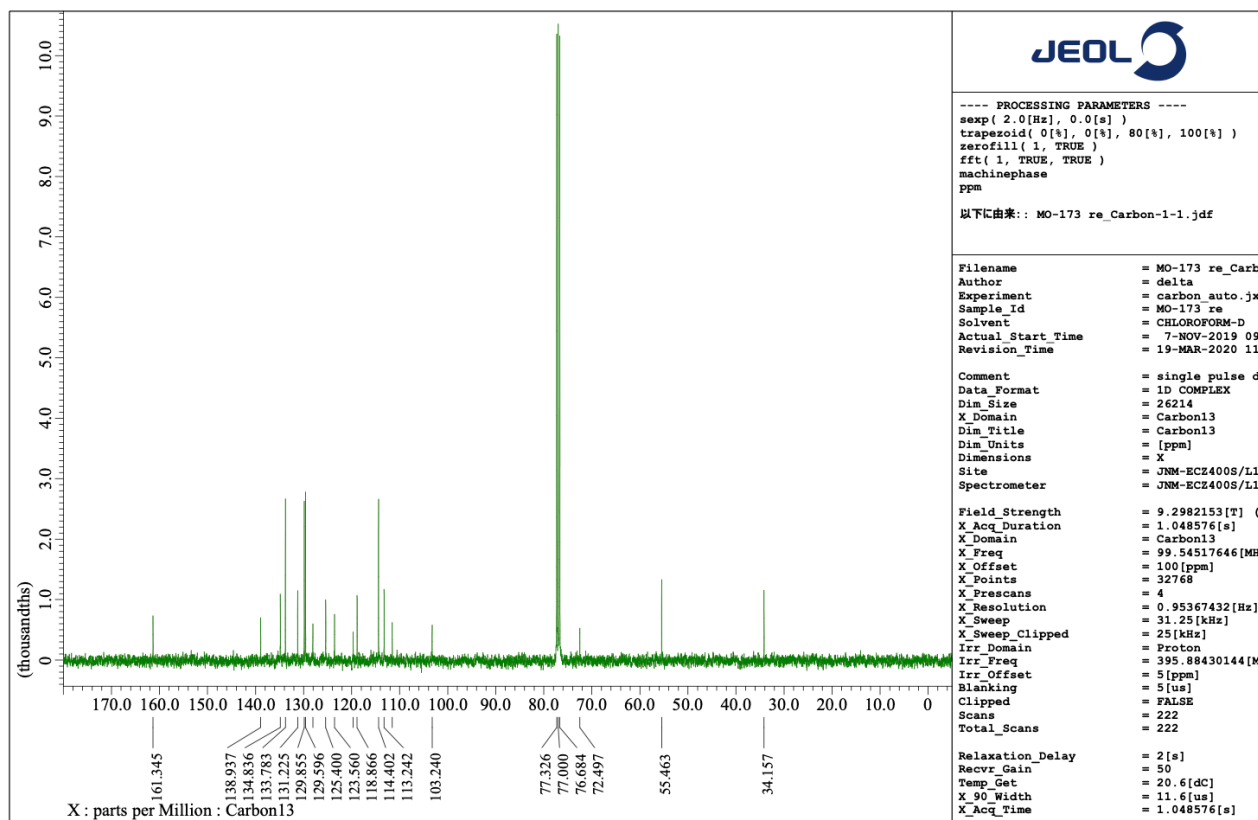

# Compound 1b

## <sup>1</sup>H NMR

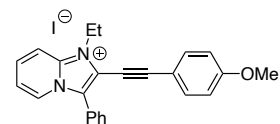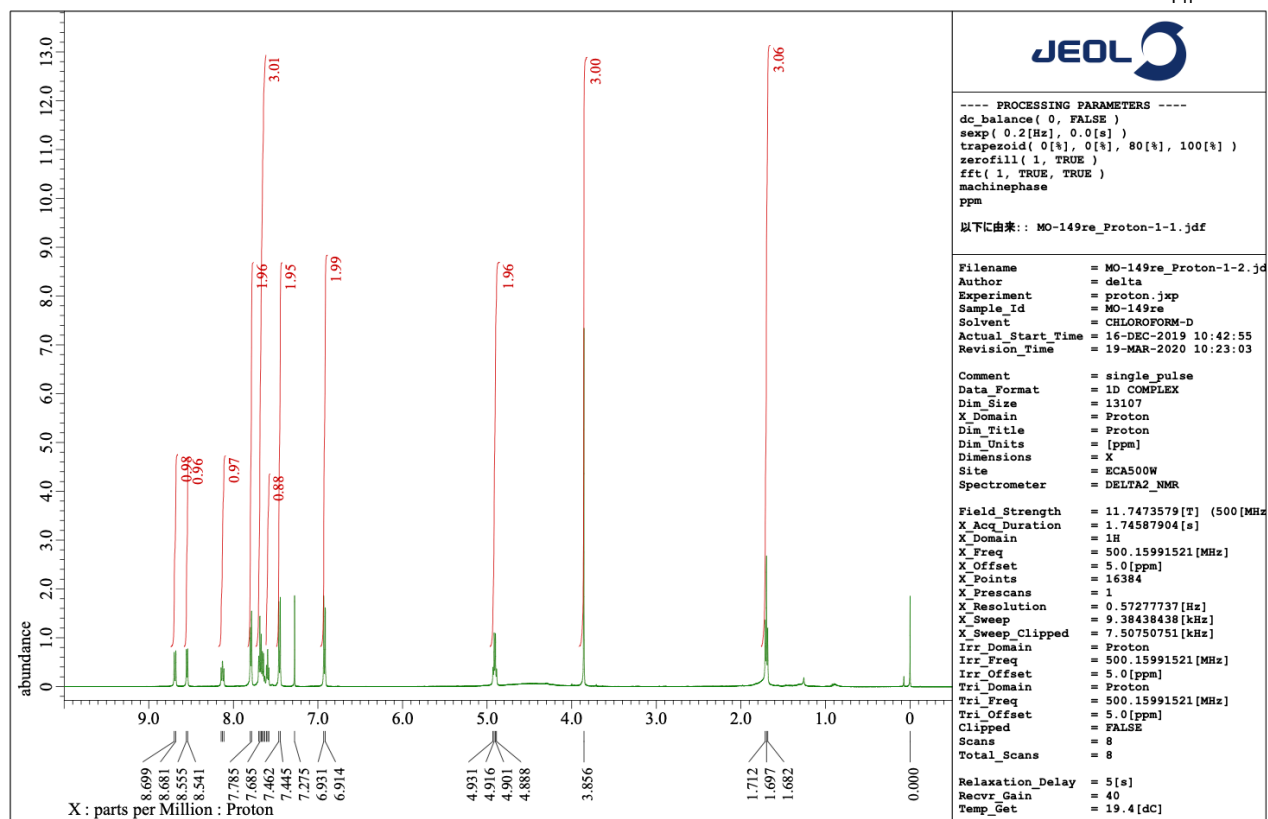

## <sup>13</sup>C NMR

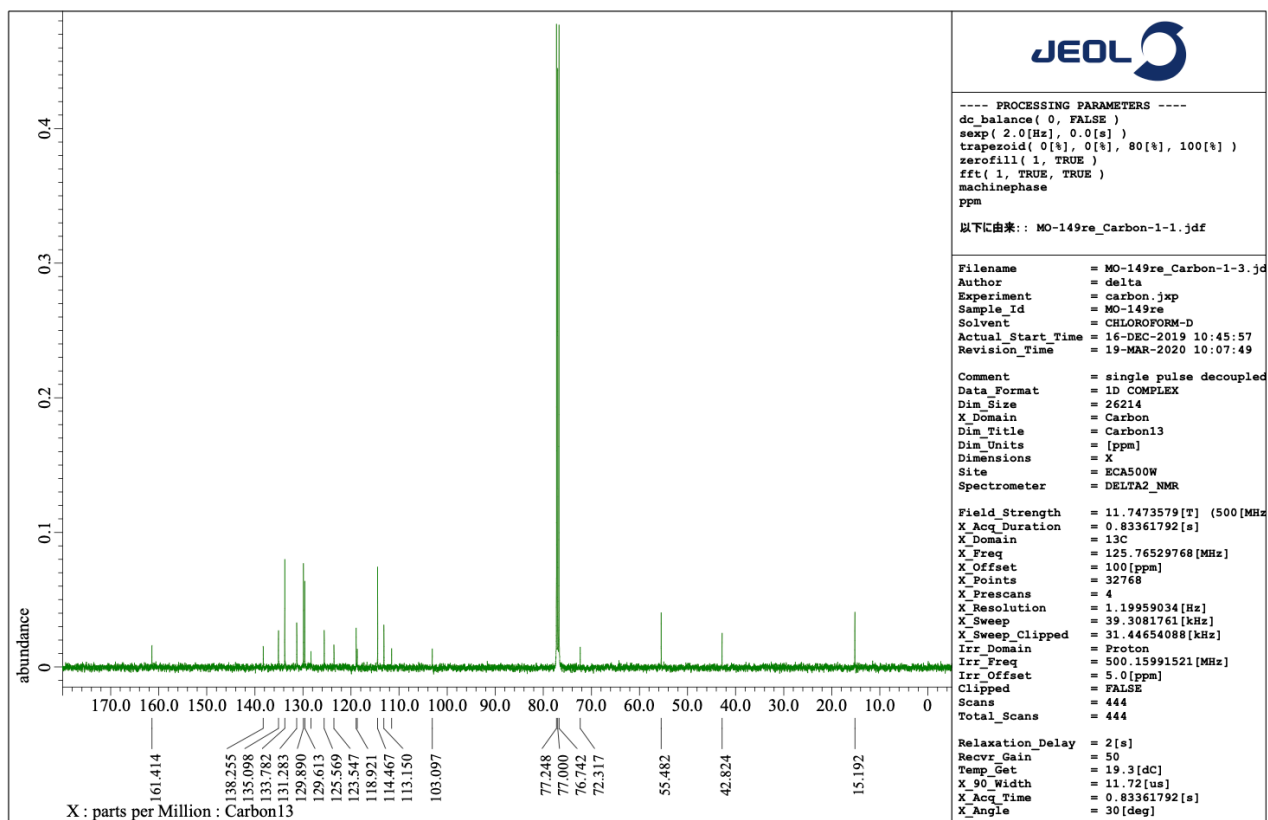

# Compound 1c

## <sup>1</sup>H NMR

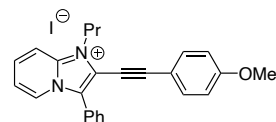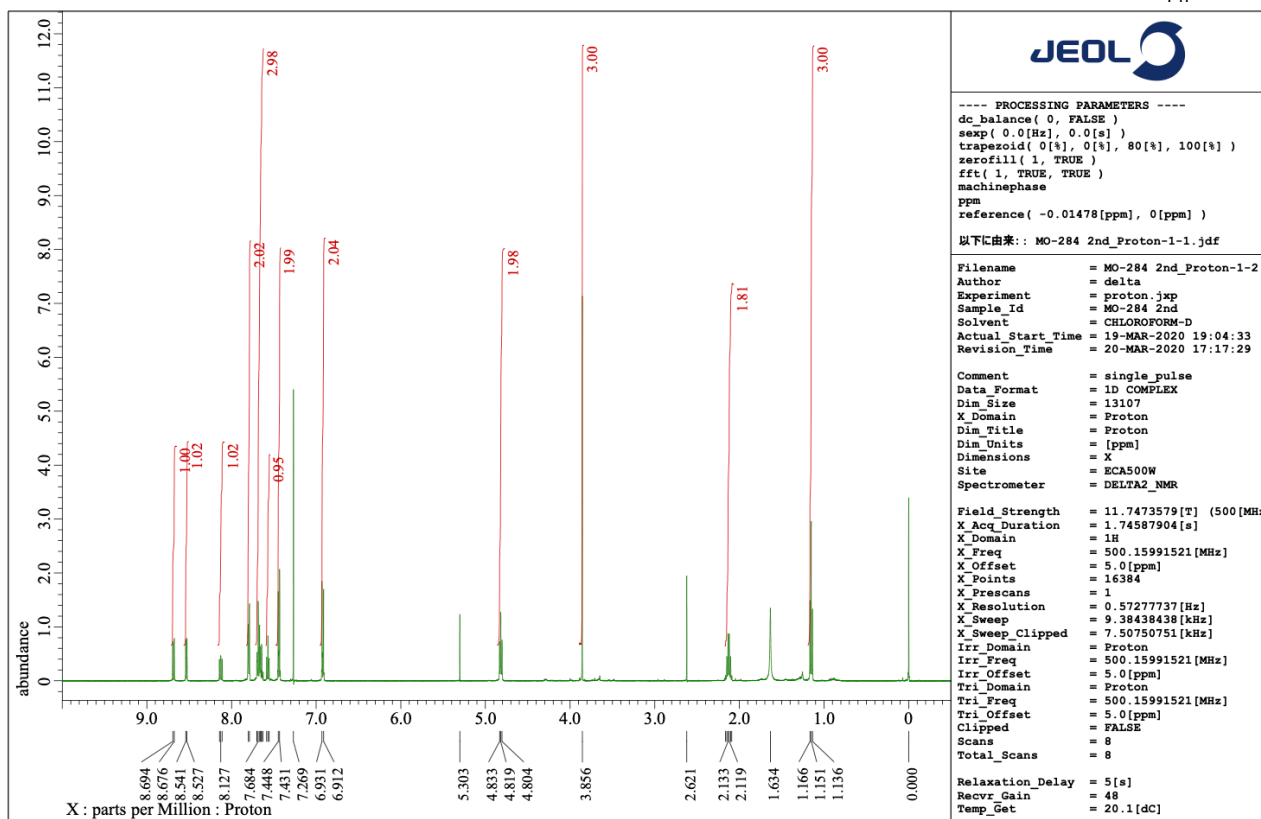

## <sup>13</sup>C NMR

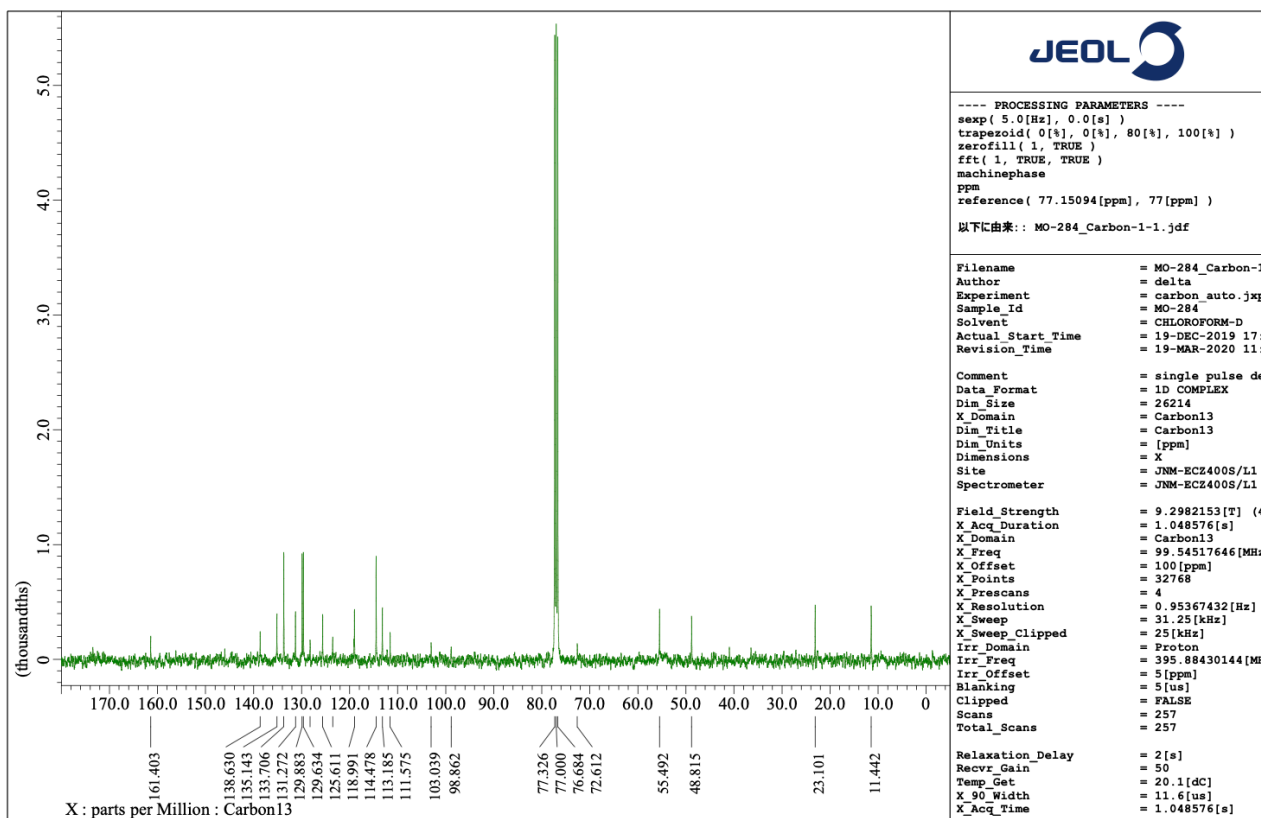

# Compound 1d

## <sup>1</sup>H NMR

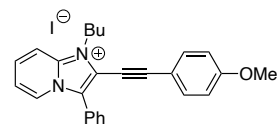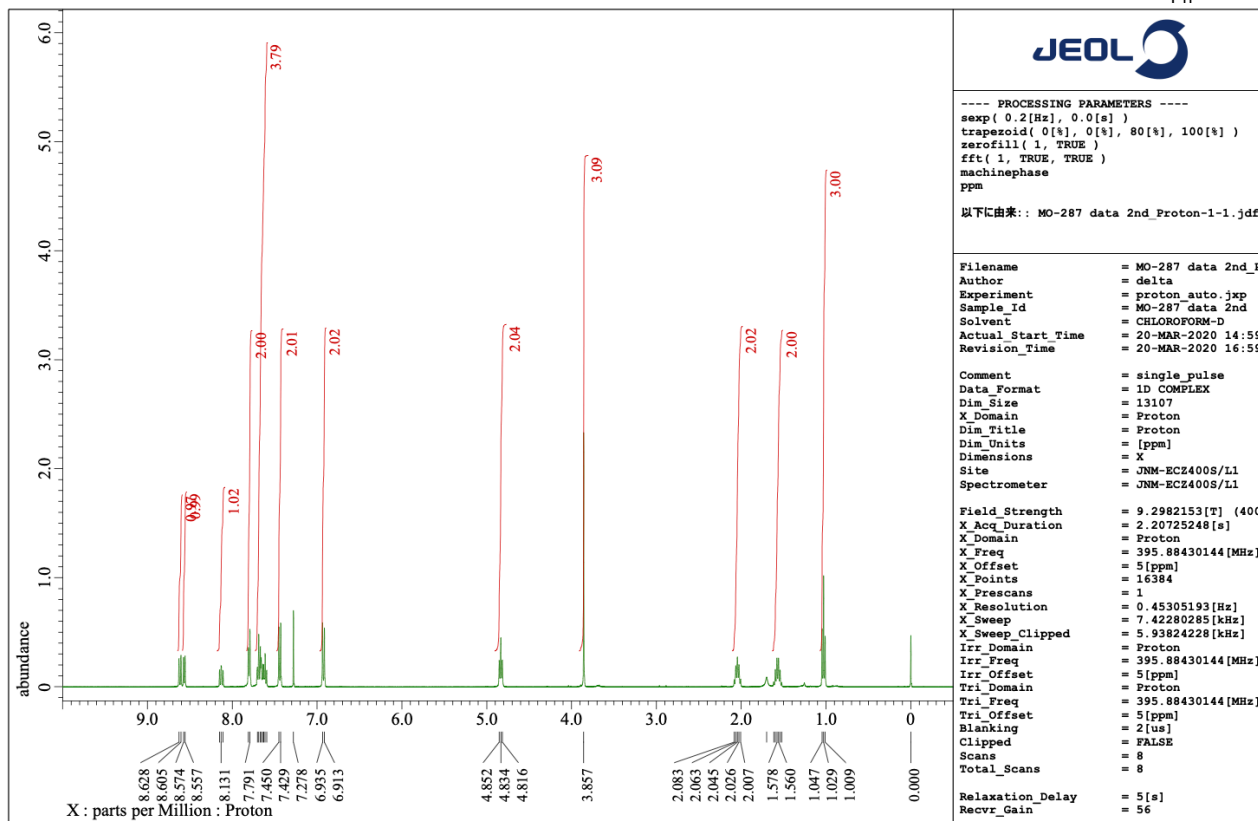

## <sup>13</sup>C NMR

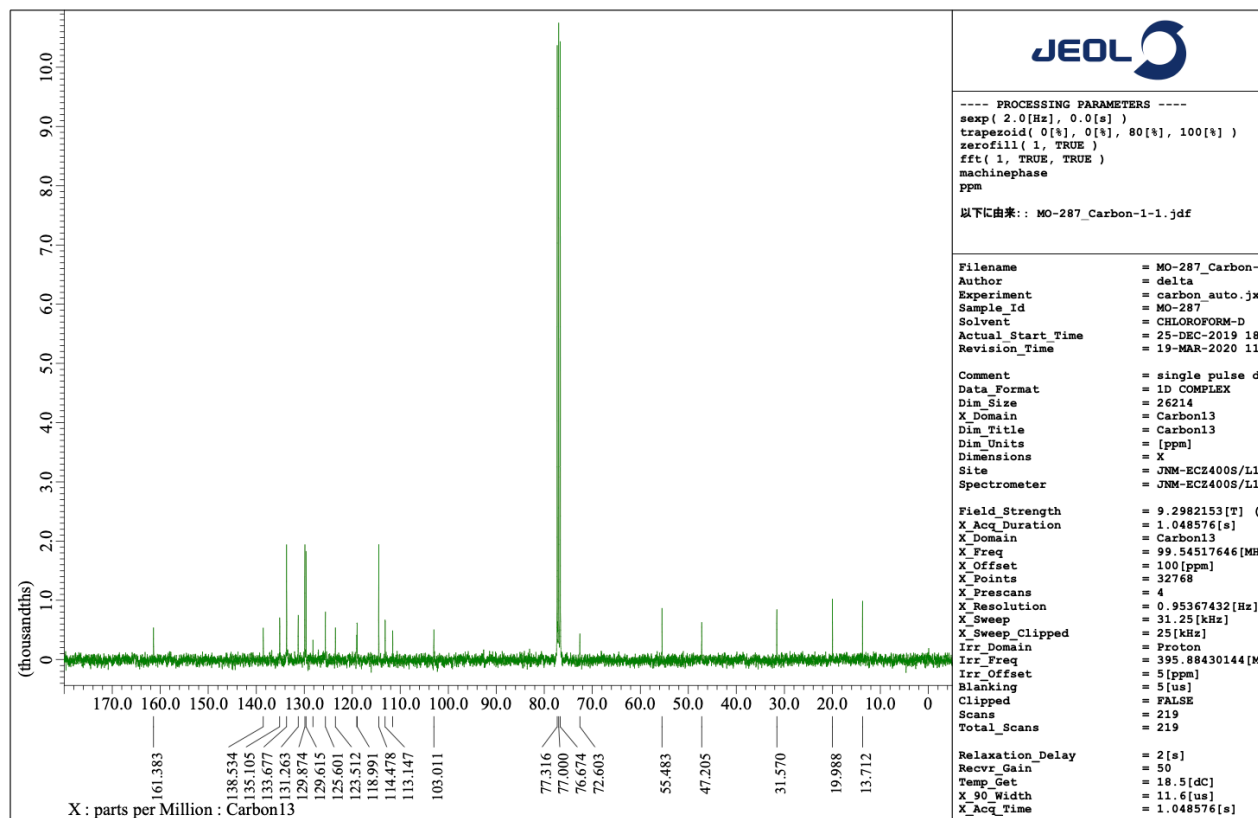

Supplement: d0ob01585g1.pdf [file d0ob01585g1.pdf]
